# Supplementary material
Source: MDPI journal article supplement (https://www.mdpi.com/2075-163X/12/11/1366)
Supplement: s1 [file s1]

**Table S1.** Risk filter and control values for soil contamination of agricultural land ( $\text{mg}\cdot\text{kg}^{-1}$ )

|    | <b>pH<math>\leq</math>5.5</b> |               | <b>5.5&lt;pH<math>\leq</math>6.5</b> |               | <b>6.5&lt;pH<math>\leq</math>7.5</b> |               | <b>pH&gt;7.5</b>  |               |
|----|-------------------------------|---------------|--------------------------------------|---------------|--------------------------------------|---------------|-------------------|---------------|
|    | Risk filter value             | Control value | Risk filter value                    | Control value | Risk filter value                    | Control value | Risk filter value | Control value |
| As | 40                            | 200           | 40                                   | 150           | 30                                   | 120           | 25                | 100           |

**Note:** Risk filter values for soil contamination refer to the risk of human health that can be ignored if the content of pollutants in the soil of construction land is equal to or lower than the value under the specific land use mode. If the value exceeds the value, there may be risks to human health. Control values refer to the content of soil pollutants that exceeds this value under specific land use patterns, and there is usually an unacceptable risk to human health. Risk control or remediation measures should be taken.

**Table S2.** Risk filter and control values for soil contamination of development land ( $\text{mg}\cdot\text{kg}^{-1}$ )

|    | <b>Risk filter values</b> |                         | <b>Control values</b>  |                         |
|----|---------------------------|-------------------------|------------------------|-------------------------|
|    | <b>First type land</b>    | <b>Second type land</b> | <b>First type land</b> | <b>Second type land</b> |
| As | 20                        | 60                      | 120                    | 140                     |

**Note:** The first type of land mainly includes: residential land, public management and public service land, primary and secondary school land, medical and health land, social welfare land, community park and children's park land, etc.; the second type of land mainly includes: industrial land, Land for logistics and storage, land for roads and transportation facilities, land for public facilities and land for squares, etc.
